# Supplementary material
Source: HighWire-hosted journal article supplement (https://bmjopen.bmj.com/content/9/7/e028709)
Supplement: inline-supplementary-material-2 [file inline-supplementary-material-2.pdf]

## **The search syntax for Web of Science**

TS = ((alcopop\* OR alcohol\* OR liquor OR liqueur OR wine OR beer OR binge OR drunk OR drink\* OR boost OR booze OR tippie OR spirits OR beverage OR cocktail\* OR "substance us\*"))

AND (adolesc\* OR "young adult\*" OR youth OR "young person\*" OR "young people" OR teen\* OR student\* OR "peer group\*" OR child\* OR pupil\* OR junior )

AND ("Rsiena" OR "R-Siena" OR "longitudinal network analys\*" OR "simulation investigation for empirical network\*" OR "stochastic actor \$oriented" OR "stochastic actor \$based" OR "actor \$based model\*" OR "actor \$based analys\*" OR "stochastic network model\*" OR "stochastic network analys\*" OR "SAOM\$" OR "SAO model\*" OR "SAB model\*" OR (network AND select\* AND influen\* AND (dynamic\* OR longit\*)) OR ((Siena AND network) NOT (Italy OR city))) )

Timespan=All years

**Search results: 85 documents, 13/05/2019**
